# Supplementary material for: Correction: Environmental Adaptation: Genomic Analysis of the Piezotolerant and Psychrotolerant Deep-Sea Iron Reducing Bacterium Shewanella piezotolerans WP3
Source: PubMed Central journal article supplement (PMC2638141; doi:10.1371/annotation/744d7c8d-db8a-4ad4-aec5-62549b1dbefe), 2008-05-08
Supplement: pone.744d7c8d-db8a-4ad4-aec5-62549b1dbefe.s001.pdf [file pone.744d7c8d-db8a-4ad4-aec5-62549b1dbefe.s001.pdf]

**Table S1. Gene size and their number**

| <b>Protein length</b> | <b>Total proteins</b> | <b>Functional proteins</b> | <b>Conserved hypothetical proteins</b> | <b>Hypothetical proteins</b> |
|-----------------------|-----------------------|----------------------------|----------------------------------------|------------------------------|
| 30-100                | 826                   | 145                        | 127                                    | 554                          |
| 101-200               | 1096                  | 643                        | 337                                    | 116                          |
| 201-300               | 973                   | 743                        | 192                                    | 38                           |
| 301-400               | 788                   | 661                        | 105                                    | 22                           |
| 401-500               | 502                   | 446                        | 52                                     | 4                            |
| >501                  | 759                   | 688                        | 64                                     | 7                            |

**Table S2. WP3 ORF blast in the sequenced *Shewanella* genomes**

| Bacterium                                 | #ORF of BLAST Hit | #ORF of Best BLAST Hit |
|-------------------------------------------|-------------------|------------------------|
| <i>Shewanella loihica</i> PV-4            | 2757              | 1634                   |
| <i>Shewanella baltica</i> OS185           | 2594              | 262                    |
| <i>Shewanella baltica</i> OS155           | 2557              | 157                    |
| <i>Shewanella</i> sp. MR-4                | 2550              | 80                     |
| <i>Shewanella</i> sp. ANA-3               | 2547              | 173                    |
| <i>Shewanella</i> sp. MR-7                | 2541              | 110                    |
| <i>Shewanella frigidimarina</i> NCIMB 400 | 2496              | 283                    |
| <i>Shewanella putrefaciens</i> CN-32      | 2477              | 171                    |
| <i>Shewanella</i> sp. W3-18-1             | 2451              | 48                     |
| <i>Shewanella oneidensis</i> MR-1         | 2319              | 100                    |
| <i>Shewanella amazonensis</i> SB2B        | 2303              | 81                     |
| <i>Shewanella denitrificans</i> OS217     | 2149              | 110                    |

**Table S3. Gene paralog families in *S. piezotolerans* WP3 and *S. oneidensis* MR-1.**

| Paralogous gene family                  | WP3 | MR-1 | Differ* | Differ%** |
|-----------------------------------------|-----|------|---------|-----------|
| VCBS/collagenase/Peptidase/Decaheme     | 62  | 40   | 22      | 41.9      |
| cytochrome c                            |     |      |         |           |
| HlyD family secretion protein           | 42  | 22   | 20      | 59.7      |
| TonB-dependent receptor                 | 41  | 26   | 15      | 44.8      |
| Acriflavin resistance protein           | 33  | 18   | 15      | 57.7      |
| Transcriptional regulator, LysR family  | 65  | 53   | 12      | 20.2      |
| MSHA pilin protein/secretory pathway    | 21  | 13   | 8       | 47.1      |
| Aldehyde dehydrogenase                  | 18  | 12   | 6       | 38.7      |
| Acetyltransferase, GNAT family          | 10  | 4    | 6       | 85.7      |
| Short-chain dehydrogenase/reductase SDR | 21  | 16   | 5       | 27        |
| NADH:ubiquinone oxidoreductase,         | 9   | 5    | 4       | 57.1      |
| Na(+)-translocating, F subunit          |     |      |         |           |
| NADH dehydrogenase                      | 9   | 5    | 4       | 57.1      |
| Nitrite reductase (cytochrome;          | 5   | 1    | 4       | 133       |
| ammonia-forming)                        |     |      |         |           |
| Glucose/galactose transporter           | 15  | 12   | 3       | 22.2      |
| Dihydrolipoamide acetyltransferase      | 15  | 12   | 3       | 22.2      |
| Aminotransferase, class V               | 12  | 9    | 3       | 28.6      |
| AMP-dependent synthetase and ligase     | 11  | 8    | 3       | 30        |
| MotA/TolQ/ExbB proton channel           | 9   | 6    | 3       | 40        |
| RNA polymerase sigma-70 factor, ECF     | 8   | 5    | 3       | 46.2      |
| subfamily                               |     |      |         |           |
| TonB, C-terminal                        | 6   | 3    | 3       | 66.7      |
| MscS Mechanosensitive ion channel       | 6   | 3    | 3       | 66.7      |
| Flagellar basal body rod protein        | 6   | 3    | 3       | 66.7      |
| Flagellar basal body rod protein        | 6   | 3    | 3       | 66.7      |

|                                                       |   |    |       |      |
|-------------------------------------------------------|---|----|-------|------|
| MoxR protein                                          | 5 | 2  | 3     | 85.7 |
| Von Willebrand factor type A domain protein           | 4 | 1  | 3     | 120  |
| Esterase, putative                                    | 4 | 1  | 3     | 120  |
| Glutathione S-transferase                             | 4 | 1  | 3     | 120  |
| Tryptophan halogenase                                 | 4 | 1  | 3     | 120  |
| Sodium/sulphate symporter                             | 4 | 1  | 3     | 120  |
| Glutathione-dependent formaldehyde-activating, GFA    | 4 | 1  | 3     | 120  |
| Conserved hypothetical protein                        | 4 | 1  | 3     | 120  |
| Conserved hypothetical protein                        | 4 | 1  | 3     | 120  |
| DTDP-glucose 4,6-dehydratase                          | 8 | 11 | -3*** | -32  |
| Ubiquinone/menaquinone biosynthesis methyltransferase | 4 | 7  | -3    | -55  |
| sulfate ABC transporter, permease protein             | 9 | 14 | -5    | -43  |
| Tetraheme cytochrome c                                | 8 | 16 | -8    | -67  |
| Conserved hypothetical protein                        | 7 | 19 | -12   | -92  |

\* Differ: the different number of genes between WP3 and MR1 in each paralogous gene family

\*\* Differ%: differ #/average number of family genes × 100

\*\*\* -: represent genes fewer in WP3 family than in MR-1

**Table S4 Cytochrome *c* genes in WP3 genome**

| <b>Synonym</b> | <b>Product</b>                                                    | <b>Heme binding sites</b> | <b>Correspondence in MR-1</b> | <b>Protein Identity</b> | <b>Putative location</b> | <b>Putative function</b> |
|----------------|-------------------------------------------------------------------|---------------------------|-------------------------------|-------------------------|--------------------------|--------------------------|
| swp3899        | decaheme cytochrome c MtrF                                        | 11                        | SO1780                        | 28%                     | OM                       | Presumably like OmcA     |
| swp0721        | decaheme cytochrome c                                             | 10                        | SO1779                        | 36%                     | OM                       | MnO2 reductase           |
| swp0896        | decaheme cytochrome c                                             | 10                        | SO1659                        | 43%                     | OM                       | Presumably like OmcA     |
| swp3272        | Doubled CXXCH motif                                               | 10                        | SO1782                        | 77%                     | Periplasmic              | MtrD                     |
| swp3274        | decaheme cytochrome c MtrF                                        | 10                        | SO1780                        | 57%                     | OM                       | Presumably like OmcA     |
| swp3275        | decaheme cytochrome c                                             | 10                        | SO1779                        | 30%                     | OM                       | MnO2 reductase           |
| swp3276        | decaheme cytochrome c                                             | 10                        | SO1779                        | 25%                     | OM                       | MnO2 reductase           |
| swp3277        | decaheme cytochrome c                                             | 10                        | SO1779                        |                         | OM                       | MnO2 reductase           |
| swp3278        | deca-heme c-type cytochrome                                       | 10                        | So1778                        | 56%                     | OM                       | MnO2 reductase           |
| swp3279        | decaheme cytochrome c MtrA                                        | 10                        | SO1777                        | 85%                     | Periplasmic              | Donor to OM cyts         |
| swp3461        | Doubled CXXCH motif                                               | 10                        | SO1427                        | 67%                     | Cyt Mem Pr               | Donor to DMSO reductase  |
| swp3466        | Decaheme cytochrome c related protein                             | 10                        | SO1780                        | 23%                     | OM                       | Presumably like OmcA     |
| swp0694        | Doubled CXXCH motif                                               | 8                         | SO0479                        | 22%                     | Periplasmic              |                          |
| swp0920        | OmpA-like transmembrane region:Fibronectin, type III: Putative Ig | 8                         | SO0479                        | 20%                     | Periplasmic              |                          |
| swp2414        | tetratricopeptide repeat family protein                           | 8                         | SO1782                        | 24%                     | Periplasmic              |                          |
| swp4579        | cytochrome c, putative                                            | 8                         | SO4144                        | 72%                     | Cyt Mem Pr               |                          |
| swp4657        | cytochrome c, putative                                            | 7                         | SO0479                        | 66%                     | periplasmic              |                          |
| swp3990        | NapC/NirT cytochrome c, N-terminal                                | 5                         | SO1233                        | 84%                     | Cyt Mem Pr               | Donor to TMSO reductase  |
| swp4117        | formate-dependent nitrite reductase                               | 5                         | SO4360                        | 35%                     | periplasmic              | Donor to DMSO reductase  |
| swp0221        | tetraheme cytochrome c                                            | 4                         | SO3623                        | 49%                     | Cyt Mem Pr               |                          |
| swp0613        | putative Formate-dependent nitrite reductase,periplasmic          | 4                         | SO3980                        | 36%                     | Cyt Mem Pr               | Nitrite reductase        |

|         |                                                                        |   |        |     |             |                                      |  |
|---------|------------------------------------------------------------------------|---|--------|-----|-------------|--------------------------------------|--|
|         | cytochrome c552 subunit                                                |   |        |     |             |                                      |  |
| swp0614 | Nitrite reductase (cytochrome; ammonia-forming)                        | 4 | SO3980 | 37% | Cyt Mem Pr  | Nitrite reductase                    |  |
| swp0919 | Nitrite reductase (cytochrome; ammonia-forming)                        | 4 | SO3980 | 59% | Cyt Mem Pr  | Nitrite reductase                    |  |
| swp2772 | Nitrate/TMAO reductases, membrane-bound tetraheme cytochrome c subunit | 4 | SO1233 | 48% | Cyt Mem Pr  | Donor to TMAO reductase              |  |
| swp2923 | cytochrome c3                                                          | 4 | SO2727 | 61% | periplasmic | Electron shuttle                     |  |
| swp3403 | Nitrite reductase (cytochrome; ammonia-forming)                        | 4 | SO3980 | 38% | Cyt Mem Pr  | Nitrite reductase                    |  |
| swp3958 | Nitrite reductase (cytochrome; ammonia-forming)                        | 4 | SO3980 | 72% | Cyt Mem Pr  | Nitrite reductase                    |  |
| swp4352 | flavocytochrome c precursor                                            | 4 | SO0970 | 60% | periplasmic | Fumarate reductase                   |  |
| swp4806 | NapC/NirT cytochrome c, N-terminal                                     | 4 | SO4591 | 80% | Cyt Mem Pr  | Nitrite, fumarate, Fe, Mn, reductase |  |
| swp2269 | Hypothetical protein                                                   | 3 | SO4572 | 30% | Cyt Mem Pr  |                                      |  |
| swp1936 | Conserved hypothetical protein                                         | 2 | SO2931 | 56% | OM          |                                      |  |
| Swp1937 | Hypothetical diheme C                                                  | 2 | SO2930 | 79% | periplasmic |                                      |  |
| swp2088 | Cytochrome c peroxidase                                                | 2 | SO2178 | 33% | periplasmic | Cyt c5 peroxidase                    |  |
| swp2575 | Cytochrome c oxidase cbb3-type, subunit III                            | 2 | SO2361 |     | Cyt Mem Pr  | Donor to oxidase                     |  |
| swp2773 | periplasmic nitrate reductase, cytochrome c-type protein               | 2 | SO0845 | 43% | periplasmic | Donor to nitrate reductase           |  |
| swp2866 | Cytochrome-c peroxidase                                                | 2 | SO2178 | 73% | periplasmic | Cyt c5 peroxidase                    |  |
| swp4011 | cytochrome c, putative                                                 | 2 | SO0939 | 52% | periplasmic |                                      |  |
| swp4047 | thiol oxidoreductase                                                   | 2 | SO2178 | 25% | periplasmic | Cyt c5 peroxidase                    |  |
| swp4142 | probable cytochrome-c peroxidase                                       | 2 | SO2178 | 32% | periplasmic | Cyt c5 peroxidase                    |  |
| swp4458 | Nitrate reductase cytochrome c-type subunit (NapB)                     | 2 | SO0845 | 59% | periplasmic | Donor to nitrate reductase           |  |
| swp4554 | cytochrome c family protein                                            | 2 | SO4047 | 70% | periplasmic |                                      |  |
| swp4555 | Cytochrome c, class I                                                  | 2 | SO4048 | 59% | periplasmic |                                      |  |
| Swp4608 | Cytochrome c peroxidase                                                | 2 | SO2178 | 42% | periplasmic | Cyt c5 peroxidase                    |  |

|         |                                                         |   |        |     |             |                           |
|---------|---------------------------------------------------------|---|--------|-----|-------------|---------------------------|
| swp4823 | Cytochrome c oxidase, subunit II: Cytochrome c, class I | 2 | SO4606 | 64% | Cyt Mem Pr  | Donor to oxidase          |
| swp5075 | soluble cytochrome cB                                   | 2 | SO4666 | 74% | periplasmic |                           |
| swp0795 | ubiquinol-cytochrome c reductase, cytochrome c1         | 1 | SO0610 | 81% | Cyt Mem Pr  | Quinol c5 reductase       |
| swp2044 | Cytochrome c, class I                                   | 1 | SO0264 | 64% | periplasmic | Donor to oxidase and BCCP |
| swp2573 | Cytochrome C oxidase, mono-heme subunit/FixO            | 1 | SO2363 | 88% | Cyt Mem Pr  | Donor to oxidase          |
| swp3755 | Cytochrome c, class II                                  | 1 | SO3420 | 77% | periplasmic |                           |
| swp3853 | Cytochrome c, class I                                   | 1 | SO0714 | 58% | periplasmic |                           |
| swp3855 | monoheme cytochrome c, putative                         | 1 | SO0716 | 59% | periplasmic |                           |
| swp3856 | Cytochrome c, class I                                   | 1 | SO0717 | 52% | periplasmic |                           |
| swp4146 | putative cytochrome                                     | 1 | SO4666 | 37% | periplasmic |                           |
| swp4577 | cytochrome c family protein                             | 1 | SO4142 | 65% | periplasmic |                           |

---

**Table S5 Comparison of Cytochrome *c* categories in the WP3 and MR-1 genomes**

| <b>gene categories</b>                     | <b>putative product</b>                                                | <b>WP3</b> | <b>MR-1</b> | <b>differ</b> |
|--------------------------------------------|------------------------------------------------------------------------|------------|-------------|---------------|
| <b>1</b>                                   | <b>decaheme cytochrome c</b>                                           | <b>17</b>  | <b>10</b>   | <b>7</b>      |
| 2                                          | Nitrate/TMAO reductases, membrane-bound tetraheme cytochrome c subunit | 3          | 2           | 1             |
| <b>3</b>                                   | <b>fumarate reductase flavoprotein subunit precursor</b>               | <b>3</b>   | <b>7</b>    | <b>-4</b>     |
| 4                                          | Cytochrome c, class I                                                  | 5          | 4           | 1             |
| <b>5</b>                                   | <b>nitrite reductase (cytochrome; ammonia-forming)</b>                 | <b>5</b>   | <b>1</b>    | <b>4</b>      |
| 6                                          | cytochrome c oxidase, cbb3-type, subunit III                           | 2          | 1           | 1             |
| 7                                          | cytochrome c551 peroxidase                                             | 2          | 1           | 1             |
| 8                                          | cytochrome c-type protein NapB                                         | 2          | 1           | 1             |
| 9                                          | hypothetical protein                                                   | 1          | 2           | -1            |
| 10                                         | cytochrome c'                                                          | 1          | 1           | 0             |
| 11                                         | cytochrome c family protein                                            | 1          | 1           | 0             |
| 12                                         | cytochrome c oxidase, cbb3-type, subunit II                            | 1          | 1           | 0             |
| 13                                         | cytochrome c oxidase, subunit II                                       | 1          | 1           | 0             |
| 14                                         | cytochrome c, putative                                                 | 1          | 1           | 0             |
| 15                                         | cytochrome c                                                           | 1          | 1           | 0             |
| 16                                         | monoheme cytochrome c, putative                                        | 1          | 1           | 0             |
| other (no counterpart in the other genome) | cytochrome c, putative                                                 | 8          | 6           | 2             |
|                                            | <b>total</b>                                                           | <b>55</b>  | <b>42</b>   | <b>13</b>     |



**Table S6, WP3-specific genes (enzymes) in KEGG pathway**

| <b>KEGG pathway map (total specific ORFs)</b>         | <b>EC</b> | <b>specific genes</b>     |
|-------------------------------------------------------|-----------|---------------------------|
| map00030:Pentose phosphate pathway, 5                 | 1.1.99.10 | swp3811                   |
|                                                       | 1.1.99.3  | swp0762, swp4566          |
|                                                       | 3.1.1.17  | swp1560, swp2391          |
| map00040:Pentose and glucuronate interconversions, 4  | 1.1.1.21  | swp0549                   |
|                                                       | 1.1.1.58  | swp3368                   |
|                                                       | 3.2.1.31  | swp4524                   |
|                                                       | 5.3.1.-   | swp4289                   |
| map00051:Fructose and mannose metabolism, 4           | 1.1.1.21  | swp0549                   |
|                                                       | 1.1.99.21 | swp4143, swp4566          |
|                                                       | 4.1.2.17  | swp4629                   |
| map00052:Galactose metabolism, 4                      | 1.1.1.21  | swp0549                   |
|                                                       | 2.7.7.10  | swp4526                   |
|                                                       | 2.7.7.12  | swp4526                   |
|                                                       | 3.2.1.108 | swp1634                   |
|                                                       | 3.2.1.23  | swp1634, swp4524          |
|                                                       | 3.2.1.85  | swp1634                   |
| map00053:Ascorbate and aldarate metabolism, 3         | 3.1.1.17  | swp1560, swp2391          |
|                                                       | 4.1.2.20  | swp0084                   |
| map00220:Urea cycle and metabolism of amino groups, 3 | 2.5.1.22  | swp0820                   |
|                                                       | 3.5.1.14  | swp2054, swp3566          |
| map00330:Arginine and proline metabolism, 9           | 1.2.1.19  | swp2434, swp3810, swp4179 |
|                                                       | 1.4.3.3   | swp1986                   |
|                                                       | 2.5.1.22  | swp0820                   |

|                                                     |          |                           |
|-----------------------------------------------------|----------|---------------------------|
|                                                     | 3.5.3.11 | swp3022                   |
|                                                     | 3.5.3.7  | swp3022                   |
|                                                     | 4.3.1.12 | swp3859                   |
|                                                     | 5.1.1.4  | swp1983, swp1985          |
| map00361:gamma-Hexachlorocyclohexane degradation, 5 | 3.1.8.1  | swp0131, swp1881, swp3662 |
|                                                     | 3.8.1.3  | swp2700                   |
|                                                     | 5.5.1.7  | swp2107                   |
| map00410:beta-Alanine metabolism, 4                 | 1.2.1.19 | swp2434, swp3810, swp4179 |
|                                                     | 2.5.1.22 | swp0820                   |
| map00500:Starch and sucrose metabolism, 10          | 2.4.1.12 | swp2166                   |
|                                                     | 2.4.1.14 | swp1411                   |
|                                                     | 2.4.1.20 | swp4297                   |
|                                                     | 2.7.7.33 | swp1317, swp2168          |
|                                                     | 3.2.1.1  | swp2674                   |
|                                                     | 3.2.1.28 | swp5044                   |
|                                                     | 3.2.1.31 | swp4524                   |
|                                                     | 3.2.1.54 | swp2674                   |
|                                                     | 4.2.1.45 | swp1598, swp3333          |
| map00520:Nucleotide sugars metabolism, 3            | 2.7.7.10 | swp4526                   |
|                                                     | 2.7.7.12 | swp4526                   |
|                                                     | 2.7.7.33 | swp1317, swp2168          |
| map00530:Aminosugars metabolism, 3                  | 4.1.3.3  | swp1907, swp1984, swp2736 |
| map00531:Glycosaminoglycan degradation, 5           | 3.1.6.12 | swp1369, swp1721, swp2417 |
|                                                     | 3.1.6.13 | swp1369, swp1721, swp2450 |
|                                                     | 3.1.6.14 | swp2417, swp2450          |

|                                                  |          |                                    |
|--------------------------------------------------|----------|------------------------------------|
|                                                  | 3.1.6.4  | swp1369, swp1721, swp2417, swp2450 |
|                                                  | 3.2.1.23 | swp1634, swp4524                   |
|                                                  | 3.2.1.31 | swp4524                            |
| map00561:Glycerolipid metabolism, 4              | 1.1.1.21 | swp0549                            |
|                                                  | 2.7.8.20 | swp4846                            |
|                                                  | 3.2.1.23 | swp1634, swp4524                   |
| map00600:Glycosphingolipid metabolism, 6         | 3.1.6.1  | swp1369, swp1721, swp2417, swp2450 |
|                                                  | 3.1.6.8  | swp1369, swp1721, swp2417, swp2450 |
|                                                  | 3.2.1.23 | swp1634, swp4524                   |
| map00930:Caprolactam degradation, 3              | 1.2.1.4  | swp1982                            |
|                                                  | 3.1.1.17 | swp1560, swp2391                   |
| map00860:Porphyrin and chlorophyll metabolism, 3 | 1.3.1.33 | swp1084                            |
|                                                  | 3.2.1.31 | swp4524                            |
|                                                  | 5.4.1.2  | swp0090                            |

---

**Table S7. WP3-specific genes involved in metabolism**

| Gene    | Length | Product                                                                             | COGid   | COG |
|---------|--------|-------------------------------------------------------------------------------------|---------|-----|
| swp2594 | 371    | Alanine dehydrogenase and pyridine nucleotide transhydrogenase                      | COG0686 | E   |
| swp0849 | 395    | Alanine dehydrogenase/PNT, C-terminal:Alanine dehydrogenase/PNT, N-terminal         | COG0686 | E   |
| swp1623 | 866    | Glycoside hydrolase, family 3, N-terminal:Glycoside hydrolase, family 3, C-terminal | COG1472 | G   |
| swp1637 | 856    | Glycoside hydrolase, family 3, N-terminal:Glycoside hydrolase, family 3, C-terminal | COG1472 | G   |
| swp1633 | 442    | Sugar:cation symporter family protein                                               | COG2211 | G   |
| swp4298 | 469    | Sugar:cation symporter family protein                                               | COG2211 | G   |
| swp1667 | 514    | Phospholipase D/Transphosphatidylase                                                | COG1502 | I   |
| swp2599 | 485    | Phospholipase D/Transphosphatidylase                                                | COG1502 | I   |
| swp3499 | 160    | Ketosteroid isomerase homolog                                                       | COG4319 | S   |
| swp3501 | 126    | Ketosteroid isomerase homolog                                                       | COG4319 | S   |
| swp2529 | 184    | Acetyltransferase                                                                   | -       | -   |
| swp1593 | 320    | Acetyltransferase                                                                   | -       | -   |
| swp2557 | 273    | Acetyltransferase, GNAT family                                                      | -       | -   |
| swp1797 | 310    | ATPase involved in DNA repair                                                       | -       | -   |
| swp2712 | 422    | ATPase involved in DNA repair                                                       | -       | -   |
| swp1798 | 628    | ATPase involved in DNA repair                                                       | -       | -   |
| swp1606 | 676    | Bacterial sugar transferase/glycosyl transferase, WecB/TagA/CpsF family protein     | -       | -   |
| swp0596 | 433    | Conserved hypothetical exported protein                                             | -       | -   |

|         |     |                                                           |         |   |
|---------|-----|-----------------------------------------------------------|---------|---|
| swp4872 | 194 | Conserved hypothetical protein                            | -       | - |
| swp0605 | 388 | Conserved hypothetical protein                            | -       | - |
| swp0332 | 395 | Conserved hypothetical protein                            | -       | - |
| swp0720 | 433 | Conserved hypothetical protein                            | -       | - |
| swp4034 | 444 | Conserved hypothetical protein                            | -       | - |
| swp1248 | 385 | Glyceraldehyde 3-phosphate dehydrogenase                  | -       | - |
| swp1245 | 464 | Glyceraldehyde 3-phosphate dehydrogenase                  | -       | - |
| swp3551 | 748 | Omega-3 polyunsaturated fatty acid synthase PfaB          | -       | - |
| swp1612 | 443 | Periplasmic protein involved in polysaccharide export     | -       | - |
| swp0036 | 248 | Transcriptional regulator, AraC family                    | COG2207 | K |
| swp0921 | 294 | Transcriptional regulator, AraC family                    | COG2207 | K |
| swp1415 | 332 | Transcriptional regulator, AraC family                    | COG2207 | K |
| swp2096 | 303 | Transcriptional regulator, AraC family                    | COG2207 | K |
| swp2451 | 302 | Transcriptional regulator, AraC family                    | COG2207 | K |
| swp2963 | 134 | Transcriptional regulator, AraC family                    | COG2207 | K |
| swp3419 | 311 | Transcriptional regulator, AraC family                    | COG2207 | K |
| swp4166 | 343 | Transcriptional regulator, AraC family                    | COG2207 | K |
| swp4561 | 247 | Transcriptional regulator, AraC family                    | COG2207 | K |
| swp4627 | 274 | Transcriptional regulator, AraC family                    | COG2207 | K |
| swp4817 | 353 | Transcriptional regulator, AraC family                    | COG2207 | K |
| swp4383 | 300 | Response regulator receiver                               | -       | - |
| swp4661 | 487 | TPR repeat:Transcriptional regulatory protein, C-terminal | COG0457 | R |
| swp2993 | 512 | Transcriptional activator CadC                            | -       | - |
| swp4848 | 662 | Transcriptional regulatory protein, C-terminal            | -       | - |
| swp2124 | 699 | Transcriptional regulatory protein, C-terminal            | -       | - |

|         |     |                                                                 |         |   |
|---------|-----|-----------------------------------------------------------------|---------|---|
| swp3288 | 740 | Transcriptional regulatory protein, C-terminal                  | -       | - |
| swp3840 | 711 | Transcriptional regulatory protein, C-terminal                  | COG1506 | E |
| swp4661 | 487 | TPR repeat:Transcriptional regulatory protein, C-terminal       | COG0457 | R |
| swp4504 | 510 | C-5 cytosine-specific DNA methylase                             | COG0270 | L |
| swp0839 | 475 | Site-specific DNA-methyltransferase                             | COG0270 | L |
| swp0008 | 412 | Site-specific DNA-methyltransferase (cytosine-specific)         | COG0270 | L |
| swp0042 | 353 | Potassium transport system, Trk family                          | COG0492 | O |
| swp0991 | 350 | Potassium transporter (Trk family)                              | COG2072 | P |
| swp3342 | 662 | BCCT transporter                                                | COG1292 | M |
| swp3813 | 405 | Conserved hypothetical transmembrane protein                    | COG1292 | M |
| swp3320 | 525 | Glycine betaine transporter                                     | COG1292 | M |
| swp4938 | 518 | Probable carnitine transporter                                  | COG1292 | M |
| swp1561 | 312 | Glycosyl transferase, family 2                                  | COG0463 | M |
| swp1569 | 289 | Glycosyl transferase, family 2                                  | COG0463 | M |
| swp1607 | 359 | Glycosyl transferase, family 2                                  | COG0463 | M |
| swp2920 | 393 | Glycosyl transferase, family 3                                  | COG0547 | E |
| swp4044 | 316 | Glycosyl transferase, family 4                                  | COG0438 | M |
| swp1411 | 386 | Glycosyl transferase, family 4                                  | COG0438 | M |
| swp0660 | 348 | Glycosyl transferase, putative                                  | COG0463 | M |
| swp4772 | 228 | Glycosyltransferase, putative                                   | -       | - |
| swp2166 | 619 | Glycosyltransferases, probably involved in cell wall biogenesis | COG1215 | M |

---

**Table S8. WP3-specific genes involved in sulfur metabolism.**

| Gene    | Product                                       | COG     | son | ppr | cps | vpa | ilo | pha |
|---------|-----------------------------------------------|---------|-----|-----|-----|-----|-----|-----|
| swp0240 | Sodium/sulphate symporter                     | COG0471 | -   | +   | +   | +   | +   | +   |
| swp1591 | Putative transporter                          | COG0471 | -   | +   | +   | +   | +   | +   |
| swp3241 | Sodium/sulphate symporter                     | COG0471 | -   | +   | +   | +   | +   | +   |
| swp4056 | TrkA-C                                        | COG0471 | -   | +   | +   | +   | +   | +   |
| swp1034 | Arylsulfatase regulator (Fe-S oxidoreductase) | COG0641 | -   | +   | +   | +   | -   | -   |
| swp1718 | Arylsulfatase regulator (Fe-S oxidoreductase) | COG0641 | -   | +   | -   | +   | -   | -   |
| swp2412 | Arylsulfatase regulator (Fe-S oxidoreductase) | COG0641 | -   | +   | -   | +   | -   | -   |
| swp5020 | Arylsulfatase regulator (Fe-S oxidoreductase) | COG0641 | -   | +   | +   | +   | -   | -   |
| swp1369 | Sulfatase family protein                      | COG3119 | -   | +   | +   | +   | -   | -   |
| swp1721 | Arylsulfatase A                               | COG3119 | -   | +   | +   | +   | -   | -   |
| swp2417 | Sulfatase family protein                      | COG3119 | -   | +   | +   | +   | -   | -   |
| swp2450 | Probable sulfatase                            | COG3119 | -   | +   | +   | +   | -   | -   |
| swp1883 | Glutathione S-transferase, N-terminal         | COG0625 | -   | +   | +   | -   | -   | -   |
| swp3308 | Glutathione S-transferase, C-terminal         | COG0625 | -   | +   | +   | -   | -   | -   |
| swp4375 | Glutathione S-transferase                     | COG0625 | -   | +   | -   | -   | -   | -   |
| swp5099 | Glutathione S-transferase                     | COG0625 | -   | +   | -   | -   | -   | -   |

Abbreviations: son, *Shewanella oneidensis*; ppr, *Photobacterium profundum*; cps, *Colwellia psychrerythraea*; vpa, *Vibrio parahaemolyticus*; ilo, *Idiomarina loihiensis*; pha, *Pseudoalteromonas haloplanktis*.

+: present; -: absent

**Table S9. WP3 genes involved in tRNA, rRNA modifications**

| <b>Gene</b> | <b>Len</b> | <b>Product</b>                                                | <b>COGid</b>   | <b>COG</b> |
|-------------|------------|---------------------------------------------------------------|----------------|------------|
| <b>gth</b>  |            |                                                               |                |            |
| swp3116     | 261        | tRNA pseudouridine synthase                                   | COG0101        | J          |
| swp1220     | 316        | tRNA pseudouridine synthase B                                 | COG0130        | J          |
| swp3267     | 259        | tRNA--hydroxylase                                             | COG4445        | FJ         |
| swp3299     | 281        | Pseudouridine synthase                                        | COG0564        | J          |
| swp4598     | 319        | Pseudouridine synthase                                        | COG0564        | J          |
| swp4996     | 237        | Pseudouridine synthase RluA-like                              | COG0564        | J          |
| swp3055     | 308        | Pseudouridine synthase, RluD                                  | COG0564        | J          |
| swp3940     | 328        | Pseudouridine synthase, RluD                                  | COG0564        | J          |
| swp1672     | 217        | Pseudouridylate synthase                                      | COG0564        | J          |
| swp3530     | 278        | Pseudouridylate synthase                                      | COG0564        | J          |
| swp4339     | 225        | Pseudouridylate synthase                                      | COG0564        | J          |
| swp2518     | 256        | Pseudouridylate synthases,<br>RNA-specific                    | 23S<br>COG0564 | J          |
| swp0893     | 233        | Pseudouridine synthase, Rsu                                   | COG1187        | J          |
| swp1866     | 226        | Pseudouridine synthase, Rsu                                   | COG1187        | J          |
| swp1929     | 290        | Pseudouridine synthase, Rsu                                   | COG1187        | J          |
| swp3865     | 230        | Pseudouridine synthase, Rsu                                   | COG1187        | J          |
| swp4417     | 240        | Pseudouridine synthase, Rsu                                   | COG1187        | J          |
| swp4126     | 228        | Ribosomal small subunit pseudouridine<br>synthase A, putative | COG1187        | J          |
| swp4290     | 210        | RNA pseudouridine synthase family                             | COG1187        | J          |

---



protein

---
